# Supplementary material
Source: HighWire-hosted journal article supplement (https://bjsm.bmj.com/content/bjsports-2019-100567)
Supplement: inline-supplementary-material-1 [file inline-supplementary-material-1.pdf]

**SUPPLEMENTARY SECTION**

Supplement 1: Patient profiles

Supplement 2: Survey content

Supplement 3: Characteristics of surgeons

Supplement 4: Opinion towards the literature

Supplement 5: Results of the treatment choice affecting patient

## Supplement 1: Patient profiles

| Profile 1                                                                           | Consultation                                                                                                                                                                                                                                                                                                                                                                                                                    | MRI                               | X-ray |                |      |                  |      |                            |    |                       |                    |                                                                                                                                                                                 |                 |                  |                    |                                                                                                                                                                            |                                                                                                                                                                                                                            |                        |         |
|-------------------------------------------------------------------------------------|---------------------------------------------------------------------------------------------------------------------------------------------------------------------------------------------------------------------------------------------------------------------------------------------------------------------------------------------------------------------------------------------------------------------------------|-----------------------------------|-------|----------------|------|------------------|------|----------------------------|----|-----------------------|--------------------|---------------------------------------------------------------------------------------------------------------------------------------------------------------------------------|-----------------|------------------|--------------------|----------------------------------------------------------------------------------------------------------------------------------------------------------------------------|----------------------------------------------------------------------------------------------------------------------------------------------------------------------------------------------------------------------------|------------------------|---------|
| Unemployed                                                                          |                                                                                                                                                                                                                                                                                                                                                                                                                                 |                                   |       |                |      |                  |      |                            |    |                       |                    |                                                                                                                                                                                 |                 |                  |                    |                                                                                                                                                                            |                                                                                                                                                                                                                            |                        |         |
|    |                                                                                                                                                                                                                                                                                                                                                                                                                                 |                                   |       |                |      |                  |      |                            |    |                       |                    |                                                                                                                                                                                 |                 |                  |                    |                                                                                                                                                                            |                                                                                                                                                                                                                            |                        |         |
| 50 y                                                                                |                                                                                                                                                                                                                                                                                                                                                                                                                                 |                                   |       |                |      |                  |      |                            |    |                       |                    |                                                                                                                                                                                 |                 |                  |                    |                                                                                                                                                                            |                                                                                                                                                                                                                            |                        |         |
| BMI 23                                                                              |                                                                                                                                                                                                                                                                                                                                                                                                                                 |                                   |       |                |      |                  |      |                            |    |                       |                    |                                                                                                                                                                                 |                 |                  |                    |                                                                                                                                                                            |                                                                                                                                                                                                                            |                        |         |
|                                                                                     | <table border="1"> <thead> <tr> <th colspan="2">Complaints</th> </tr> </thead> <tbody> <tr> <td>Pseudo-locking</td> <td>-</td> </tr> <tr> <td>VAS rest (0-100)</td> <td>1</td> </tr> <tr> <td>VAS weight bearing (0-100)</td> <td>7</td> </tr> <tr> <td>IKDC score (0-100)</td> <td>85</td> </tr> </tbody> </table>                                                                                                             | Complaints                        |       | Pseudo-locking | -    | VAS rest (0-100) | 1    | VAS weight bearing (0-100) | 7  | IKDC score (0-100)    | 85                 | <table border="1"> <thead> <tr> <th>Medial meniscus</th> <th>Lateral meniscus</th> </tr> </thead> <tbody> <tr> <td>Horizontal tear</td> <td>Intact</td> </tr> </tbody> </table> | Medial meniscus | Lateral meniscus | Horizontal tear    | Intact                                                                                                                                                                     | <table border="1"> <thead> <tr> <th>Kellgren-Lawrence (OA)</th> </tr> </thead> <tbody> <tr> <td>Grade 1</td> </tr> </tbody> </table>    | Kellgren-Lawrence (OA) | Grade 1 |
| Complaints                                                                          |                                                                                                                                                                                                                                                                                                                                                                                                                                 |                                   |       |                |      |                  |      |                            |    |                       |                    |                                                                                                                                                                                 |                 |                  |                    |                                                                                                                                                                            |                                                                                                                                                                                                                            |                        |         |
| Pseudo-locking                                                                      | -                                                                                                                                                                                                                                                                                                                                                                                                                               |                                   |       |                |      |                  |      |                            |    |                       |                    |                                                                                                                                                                                 |                 |                  |                    |                                                                                                                                                                            |                                                                                                                                                                                                                            |                        |         |
| VAS rest (0-100)                                                                    | 1                                                                                                                                                                                                                                                                                                                                                                                                                               |                                   |       |                |      |                  |      |                            |    |                       |                    |                                                                                                                                                                                 |                 |                  |                    |                                                                                                                                                                            |                                                                                                                                                                                                                            |                        |         |
| VAS weight bearing (0-100)                                                          | 7                                                                                                                                                                                                                                                                                                                                                                                                                               |                                   |       |                |      |                  |      |                            |    |                       |                    |                                                                                                                                                                                 |                 |                  |                    |                                                                                                                                                                            |                                                                                                                                                                                                                            |                        |         |
| IKDC score (0-100)                                                                  | 85                                                                                                                                                                                                                                                                                                                                                                                                                              |                                   |       |                |      |                  |      |                            |    |                       |                    |                                                                                                                                                                                 |                 |                  |                    |                                                                                                                                                                            |                                                                                                                                                                                                                            |                        |         |
| Medial meniscus                                                                     | Lateral meniscus                                                                                                                                                                                                                                                                                                                                                                                                                |                                   |       |                |      |                  |      |                            |    |                       |                    |                                                                                                                                                                                 |                 |                  |                    |                                                                                                                                                                            |                                                                                                                                                                                                                            |                        |         |
| Horizontal tear                                                                     | Intact                                                                                                                                                                                                                                                                                                                                                                                                                          |                                   |       |                |      |                  |      |                            |    |                       |                    |                                                                                                                                                                                 |                 |                  |                    |                                                                                                                                                                            |                                                                                                                                                                                                                            |                        |         |
| Kellgren-Lawrence (OA)                                                              |                                                                                                                                                                                                                                                                                                                                                                                                                                 |                                   |       |                |      |                  |      |                            |    |                       |                    |                                                                                                                                                                                 |                 |                  |                    |                                                                                                                                                                            |                                                                                                                                                                                                                            |                        |         |
| Grade 1                                                                             |                                                                                                                                                                                                                                                                                                                                                                                                                                 |                                   |       |                |      |                  |      |                            |    |                       |                    |                                                                                                                                                                                 |                 |                  |                    |                                                                                                                                                                            |                                                                                                                                                                                                                            |                        |         |
|                                                                                     | <table border="1"> <thead> <tr> <th colspan="2">Physical exam</th> </tr> </thead> <tbody> <tr> <td>Flexion</td> <td>140°</td> </tr> <tr> <td>Extension</td> <td>+5°</td> </tr> <tr> <td>Joint effusion</td> <td>-</td> </tr> <tr> <td>Joint line tenderness</td> <td>-</td> </tr> <tr> <td>McMurray</td> <td>pain medial</td> </tr> <tr> <td>Thessaly</td> <td>-</td> </tr> </tbody> </table>                                   | Physical exam                     |       | Flexion        | 140° | Extension        | +5°  | Joint effusion             | -  | Joint line tenderness | -                  | McMurray                                                                                                                                                                        | pain medial     | Thessaly         | -                  |       |                                                                                                                                                                                                                            |                        |         |
| Physical exam                                                                       |                                                                                                                                                                                                                                                                                                                                                                                                                                 |                                   |       |                |      |                  |      |                            |    |                       |                    |                                                                                                                                                                                 |                 |                  |                    |                                                                                                                                                                            |                                                                                                                                                                                                                            |                        |         |
| Flexion                                                                             | 140°                                                                                                                                                                                                                                                                                                                                                                                                                            |                                   |       |                |      |                  |      |                            |    |                       |                    |                                                                                                                                                                                 |                 |                  |                    |                                                                                                                                                                            |                                                                                                                                                                                                                            |                        |         |
| Extension                                                                           | +5°                                                                                                                                                                                                                                                                                                                                                                                                                             |                                   |       |                |      |                  |      |                            |    |                       |                    |                                                                                                                                                                                 |                 |                  |                    |                                                                                                                                                                            |                                                                                                                                                                                                                            |                        |         |
| Joint effusion                                                                      | -                                                                                                                                                                                                                                                                                                                                                                                                                               |                                   |       |                |      |                  |      |                            |    |                       |                    |                                                                                                                                                                                 |                 |                  |                    |                                                                                                                                                                            |                                                                                                                                                                                                                            |                        |         |
| Joint line tenderness                                                               | -                                                                                                                                                                                                                                                                                                                                                                                                                               |                                   |       |                |      |                  |      |                            |    |                       |                    |                                                                                                                                                                                 |                 |                  |                    |                                                                                                                                                                            |                                                                                                                                                                                                                            |                        |         |
| McMurray                                                                            | pain medial                                                                                                                                                                                                                                                                                                                                                                                                                     |                                   |       |                |      |                  |      |                            |    |                       |                    |                                                                                                                                                                                 |                 |                  |                    |                                                                                                                                                                            |                                                                                                                                                                                                                            |                        |         |
| Thessaly                                                                            | -                                                                                                                                                                                                                                                                                                                                                                                                                               |                                   |       |                |      |                  |      |                            |    |                       |                    |                                                                                                                                                                                 |                 |                  |                    |                                                                                                                                                                            |                                                                                                                                                                                                                            |                        |         |
|                                                                                     | <table border="1"> <thead> <tr> <th colspan="2">Physical therapy in last 3 months</th> </tr> </thead> <tbody> <tr> <td>No</td> <td></td> </tr> </tbody> </table>                                                                                                                                                                                                                                                                | Physical therapy in last 3 months |       | No             |      |                  |      |                            |    |                       |                    |                                                                                                                                                                                 |                 |                  |                    |                                                                                                                                                                            |                                                                                                                                                                                                                            |                        |         |
| Physical therapy in last 3 months                                                   |                                                                                                                                                                                                                                                                                                                                                                                                                                 |                                   |       |                |      |                  |      |                            |    |                       |                    |                                                                                                                                                                                 |                 |                  |                    |                                                                                                                                                                            |                                                                                                                                                                                                                            |                        |         |
| No                                                                                  |                                                                                                                                                                                                                                                                                                                                                                                                                                 |                                   |       |                |      |                  |      |                            |    |                       |                    |                                                                                                                                                                                 |                 |                  |                    |                                                                                                                                                                            |                                                                                                                                                                                                                            |                        |         |
| Profile 2                                                                           | Consultation                                                                                                                                                                                                                                                                                                                                                                                                                    | MRI                               | X-ray |                |      |                  |      |                            |    |                       |                    |                                                                                                                                                                                 |                 |                  |                    |                                                                                                                                                                            |                                                                                                                                                                                                                            |                        |         |
| Professional cook                                                                   |                                                                                                                                                                                                                                                                                                                                                                                                                                 |                                   |       |                |      |                  |      |                            |    |                       |                    |                                                                                                                                                                                 |                 |                  |                    |                                                                                                                                                                            |                                                                                                                                                                                                                            |                        |         |
|   |                                                                                                                                                                                                                                                                                                                                                                                                                                 |                                   |       |                |      |                  |      |                            |    |                       |                    |                                                                                                                                                                                 |                 |                  |                    |                                                                                                                                                                            |                                                                                                                                                                                                                            |                        |         |
| 54 y                                                                                |                                                                                                                                                                                                                                                                                                                                                                                                                                 |                                   |       |                |      |                  |      |                            |    |                       |                    |                                                                                                                                                                                 |                 |                  |                    |                                                                                                                                                                            |                                                                                                                                                                                                                            |                        |         |
| BMI 23                                                                              |                                                                                                                                                                                                                                                                                                                                                                                                                                 |                                   |       |                |      |                  |      |                            |    |                       |                    |                                                                                                                                                                                 |                 |                  |                    |                                                                                                                                                                            |                                                                                                                                                                                                                            |                        |         |
|                                                                                     | <table border="1"> <thead> <tr> <th colspan="2">Complaints</th> </tr> </thead> <tbody> <tr> <td>Pseudo-locking</td> <td>-</td> </tr> <tr> <td>VAS rest (0-100)</td> <td>56</td> </tr> <tr> <td>VAS weight bearing (0-100)</td> <td>85</td> </tr> <tr> <td>IKDC score (0-100)</td> <td>57</td> </tr> </tbody> </table>                                                                                                           | Complaints                        |       | Pseudo-locking | -    | VAS rest (0-100) | 56   | VAS weight bearing (0-100) | 85 | IKDC score (0-100)    | 57                 | <table border="1"> <thead> <tr> <th>Medial meniscus</th> <th>Lateral meniscus</th> </tr> </thead> <tbody> <tr> <td>Horizontal tear</td> <td>Intact</td> </tr> </tbody> </table> | Medial meniscus | Lateral meniscus | Horizontal tear    | Intact                                                                                                                                                                     | <table border="1"> <thead> <tr> <th>Kellgren-Lawrence (OA)</th> </tr> </thead> <tbody> <tr> <td>Grade 0</td> </tr> </tbody> </table>  | Kellgren-Lawrence (OA) | Grade 0 |
| Complaints                                                                          |                                                                                                                                                                                                                                                                                                                                                                                                                                 |                                   |       |                |      |                  |      |                            |    |                       |                    |                                                                                                                                                                                 |                 |                  |                    |                                                                                                                                                                            |                                                                                                                                                                                                                            |                        |         |
| Pseudo-locking                                                                      | -                                                                                                                                                                                                                                                                                                                                                                                                                               |                                   |       |                |      |                  |      |                            |    |                       |                    |                                                                                                                                                                                 |                 |                  |                    |                                                                                                                                                                            |                                                                                                                                                                                                                            |                        |         |
| VAS rest (0-100)                                                                    | 56                                                                                                                                                                                                                                                                                                                                                                                                                              |                                   |       |                |      |                  |      |                            |    |                       |                    |                                                                                                                                                                                 |                 |                  |                    |                                                                                                                                                                            |                                                                                                                                                                                                                            |                        |         |
| VAS weight bearing (0-100)                                                          | 85                                                                                                                                                                                                                                                                                                                                                                                                                              |                                   |       |                |      |                  |      |                            |    |                       |                    |                                                                                                                                                                                 |                 |                  |                    |                                                                                                                                                                            |                                                                                                                                                                                                                            |                        |         |
| IKDC score (0-100)                                                                  | 57                                                                                                                                                                                                                                                                                                                                                                                                                              |                                   |       |                |      |                  |      |                            |    |                       |                    |                                                                                                                                                                                 |                 |                  |                    |                                                                                                                                                                            |                                                                                                                                                                                                                            |                        |         |
| Medial meniscus                                                                     | Lateral meniscus                                                                                                                                                                                                                                                                                                                                                                                                                |                                   |       |                |      |                  |      |                            |    |                       |                    |                                                                                                                                                                                 |                 |                  |                    |                                                                                                                                                                            |                                                                                                                                                                                                                            |                        |         |
| Horizontal tear                                                                     | Intact                                                                                                                                                                                                                                                                                                                                                                                                                          |                                   |       |                |      |                  |      |                            |    |                       |                    |                                                                                                                                                                                 |                 |                  |                    |                                                                                                                                                                            |                                                                                                                                                                                                                            |                        |         |
| Kellgren-Lawrence (OA)                                                              |                                                                                                                                                                                                                                                                                                                                                                                                                                 |                                   |       |                |      |                  |      |                            |    |                       |                    |                                                                                                                                                                                 |                 |                  |                    |                                                                                                                                                                            |                                                                                                                                                                                                                            |                        |         |
| Grade 0                                                                             |                                                                                                                                                                                                                                                                                                                                                                                                                                 |                                   |       |                |      |                  |      |                            |    |                       |                    |                                                                                                                                                                                 |                 |                  |                    |                                                                                                                                                                            |                                                                                                                                                                                                                            |                        |         |
|                                                                                     | <table border="1"> <thead> <tr> <th colspan="2">Physical exam</th> </tr> </thead> <tbody> <tr> <td>Flexion</td> <td>120°</td> </tr> <tr> <td>Extension</td> <td>+10°</td> </tr> <tr> <td>Joint effusion</td> <td>+</td> </tr> <tr> <td>Joint line tenderness</td> <td>medial</td> </tr> <tr> <td>McMurray</td> <td>-</td> </tr> <tr> <td>Thessaly</td> <td>pain medial in 20°</td> </tr> </tbody> </table>                      | Physical exam                     |       | Flexion        | 120° | Extension        | +10° | Joint effusion             | +  | Joint line tenderness | medial             | McMurray                                                                                                                                                                        | -               | Thessaly         | pain medial in 20° |   |                                                                                                                                                                                                                            |                        |         |
| Physical exam                                                                       |                                                                                                                                                                                                                                                                                                                                                                                                                                 |                                   |       |                |      |                  |      |                            |    |                       |                    |                                                                                                                                                                                 |                 |                  |                    |                                                                                                                                                                            |                                                                                                                                                                                                                            |                        |         |
| Flexion                                                                             | 120°                                                                                                                                                                                                                                                                                                                                                                                                                            |                                   |       |                |      |                  |      |                            |    |                       |                    |                                                                                                                                                                                 |                 |                  |                    |                                                                                                                                                                            |                                                                                                                                                                                                                            |                        |         |
| Extension                                                                           | +10°                                                                                                                                                                                                                                                                                                                                                                                                                            |                                   |       |                |      |                  |      |                            |    |                       |                    |                                                                                                                                                                                 |                 |                  |                    |                                                                                                                                                                            |                                                                                                                                                                                                                            |                        |         |
| Joint effusion                                                                      | +                                                                                                                                                                                                                                                                                                                                                                                                                               |                                   |       |                |      |                  |      |                            |    |                       |                    |                                                                                                                                                                                 |                 |                  |                    |                                                                                                                                                                            |                                                                                                                                                                                                                            |                        |         |
| Joint line tenderness                                                               | medial                                                                                                                                                                                                                                                                                                                                                                                                                          |                                   |       |                |      |                  |      |                            |    |                       |                    |                                                                                                                                                                                 |                 |                  |                    |                                                                                                                                                                            |                                                                                                                                                                                                                            |                        |         |
| McMurray                                                                            | -                                                                                                                                                                                                                                                                                                                                                                                                                               |                                   |       |                |      |                  |      |                            |    |                       |                    |                                                                                                                                                                                 |                 |                  |                    |                                                                                                                                                                            |                                                                                                                                                                                                                            |                        |         |
| Thessaly                                                                            | pain medial in 20°                                                                                                                                                                                                                                                                                                                                                                                                              |                                   |       |                |      |                  |      |                            |    |                       |                    |                                                                                                                                                                                 |                 |                  |                    |                                                                                                                                                                            |                                                                                                                                                                                                                            |                        |         |
|                                                                                     | <table border="1"> <thead> <tr> <th colspan="2">Physical therapy in last 3 months</th> </tr> </thead> <tbody> <tr> <td>No</td> <td></td> </tr> </tbody> </table>                                                                                                                                                                                                                                                                | Physical therapy in last 3 months |       | No             |      |                  |      |                            |    |                       |                    |                                                                                                                                                                                 |                 |                  |                    |                                                                                                                                                                            |                                                                                                                                                                                                                            |                        |         |
| Physical therapy in last 3 months                                                   |                                                                                                                                                                                                                                                                                                                                                                                                                                 |                                   |       |                |      |                  |      |                            |    |                       |                    |                                                                                                                                                                                 |                 |                  |                    |                                                                                                                                                                            |                                                                                                                                                                                                                            |                        |         |
| No                                                                                  |                                                                                                                                                                                                                                                                                                                                                                                                                                 |                                   |       |                |      |                  |      |                            |    |                       |                    |                                                                                                                                                                                 |                 |                  |                    |                                                                                                                                                                            |                                                                                                                                                                                                                            |                        |         |
| Profile 3                                                                           | Consultation                                                                                                                                                                                                                                                                                                                                                                                                                    | MRI                               | X-ray |                |      |                  |      |                            |    |                       |                    |                                                                                                                                                                                 |                 |                  |                    |                                                                                                                                                                            |                                                                                                                                                                                                                            |                        |         |
| Functional manager                                                                  |                                                                                                                                                                                                                                                                                                                                                                                                                                 |                                   |       |                |      |                  |      |                            |    |                       |                    |                                                                                                                                                                                 |                 |                  |                    |                                                                                                                                                                            |                                                                                                                                                                                                                            |                        |         |
|  |                                                                                                                                                                                                                                                                                                                                                                                                                                 |                                   |       |                |      |                  |      |                            |    |                       |                    |                                                                                                                                                                                 |                 |                  |                    |                                                                                                                                                                            |                                                                                                                                                                                                                            |                        |         |
| 45 y                                                                                |                                                                                                                                                                                                                                                                                                                                                                                                                                 |                                   |       |                |      |                  |      |                            |    |                       |                    |                                                                                                                                                                                 |                 |                  |                    |                                                                                                                                                                            |                                                                                                                                                                                                                            |                        |         |
| BMI 24                                                                              |                                                                                                                                                                                                                                                                                                                                                                                                                                 |                                   |       |                |      |                  |      |                            |    |                       |                    |                                                                                                                                                                                 |                 |                  |                    |                                                                                                                                                                            |                                                                                                                                                                                                                            |                        |         |
|                                                                                     | <table border="1"> <thead> <tr> <th colspan="2">Complaints</th> </tr> </thead> <tbody> <tr> <td>Pseudo-locking</td> <td>-</td> </tr> <tr> <td>VAS rest (0-100)</td> <td>52</td> </tr> <tr> <td>VAS weight bearing (0-100)</td> <td>60</td> </tr> <tr> <td>IKDC score (0-100)</td> <td>67</td> </tr> </tbody> </table>                                                                                                           | Complaints                        |       | Pseudo-locking | -    | VAS rest (0-100) | 52   | VAS weight bearing (0-100) | 60 | IKDC score (0-100)    | 67                 | <table border="1"> <thead> <tr> <th>Medial meniscus</th> <th>Lateral meniscus</th> </tr> </thead> <tbody> <tr> <td>Intact</td> <td>Complex tear</td> </tr> </tbody> </table>    | Medial meniscus | Lateral meniscus | Intact             | Complex tear                                                                                                                                                               | <table border="1"> <thead> <tr> <th>Kellgren-Lawrence (OA)</th> </tr> </thead> <tbody> <tr> <td>Grade 1</td> </tr> </tbody> </table>  | Kellgren-Lawrence (OA) | Grade 1 |
| Complaints                                                                          |                                                                                                                                                                                                                                                                                                                                                                                                                                 |                                   |       |                |      |                  |      |                            |    |                       |                    |                                                                                                                                                                                 |                 |                  |                    |                                                                                                                                                                            |                                                                                                                                                                                                                            |                        |         |
| Pseudo-locking                                                                      | -                                                                                                                                                                                                                                                                                                                                                                                                                               |                                   |       |                |      |                  |      |                            |    |                       |                    |                                                                                                                                                                                 |                 |                  |                    |                                                                                                                                                                            |                                                                                                                                                                                                                            |                        |         |
| VAS rest (0-100)                                                                    | 52                                                                                                                                                                                                                                                                                                                                                                                                                              |                                   |       |                |      |                  |      |                            |    |                       |                    |                                                                                                                                                                                 |                 |                  |                    |                                                                                                                                                                            |                                                                                                                                                                                                                            |                        |         |
| VAS weight bearing (0-100)                                                          | 60                                                                                                                                                                                                                                                                                                                                                                                                                              |                                   |       |                |      |                  |      |                            |    |                       |                    |                                                                                                                                                                                 |                 |                  |                    |                                                                                                                                                                            |                                                                                                                                                                                                                            |                        |         |
| IKDC score (0-100)                                                                  | 67                                                                                                                                                                                                                                                                                                                                                                                                                              |                                   |       |                |      |                  |      |                            |    |                       |                    |                                                                                                                                                                                 |                 |                  |                    |                                                                                                                                                                            |                                                                                                                                                                                                                            |                        |         |
| Medial meniscus                                                                     | Lateral meniscus                                                                                                                                                                                                                                                                                                                                                                                                                |                                   |       |                |      |                  |      |                            |    |                       |                    |                                                                                                                                                                                 |                 |                  |                    |                                                                                                                                                                            |                                                                                                                                                                                                                            |                        |         |
| Intact                                                                              | Complex tear                                                                                                                                                                                                                                                                                                                                                                                                                    |                                   |       |                |      |                  |      |                            |    |                       |                    |                                                                                                                                                                                 |                 |                  |                    |                                                                                                                                                                            |                                                                                                                                                                                                                            |                        |         |
| Kellgren-Lawrence (OA)                                                              |                                                                                                                                                                                                                                                                                                                                                                                                                                 |                                   |       |                |      |                  |      |                            |    |                       |                    |                                                                                                                                                                                 |                 |                  |                    |                                                                                                                                                                            |                                                                                                                                                                                                                            |                        |         |
| Grade 1                                                                             |                                                                                                                                                                                                                                                                                                                                                                                                                                 |                                   |       |                |      |                  |      |                            |    |                       |                    |                                                                                                                                                                                 |                 |                  |                    |                                                                                                                                                                            |                                                                                                                                                                                                                            |                        |         |
|                                                                                     | <table border="1"> <thead> <tr> <th colspan="2">Physical exam</th> </tr> </thead> <tbody> <tr> <td>Flexion</td> <td>140°</td> </tr> <tr> <td>Extension</td> <td>0°</td> </tr> <tr> <td>Joint effusion</td> <td>-</td> </tr> <tr> <td>Joint line tenderness</td> <td>medial and lateral</td> </tr> <tr> <td>McMurray</td> <td>pain lateral</td> </tr> <tr> <td>Thessaly</td> <td>pain lateral in 5°</td> </tr> </tbody> </table> | Physical exam                     |       | Flexion        | 140° | Extension        | 0°   | Joint effusion             | -  | Joint line tenderness | medial and lateral | McMurray                                                                                                                                                                        | pain lateral    | Thessaly         | pain lateral in 5° |   |                                                                                                                                                                                                                            |                        |         |
| Physical exam                                                                       |                                                                                                                                                                                                                                                                                                                                                                                                                                 |                                   |       |                |      |                  |      |                            |    |                       |                    |                                                                                                                                                                                 |                 |                  |                    |                                                                                                                                                                            |                                                                                                                                                                                                                            |                        |         |
| Flexion                                                                             | 140°                                                                                                                                                                                                                                                                                                                                                                                                                            |                                   |       |                |      |                  |      |                            |    |                       |                    |                                                                                                                                                                                 |                 |                  |                    |                                                                                                                                                                            |                                                                                                                                                                                                                            |                        |         |
| Extension                                                                           | 0°                                                                                                                                                                                                                                                                                                                                                                                                                              |                                   |       |                |      |                  |      |                            |    |                       |                    |                                                                                                                                                                                 |                 |                  |                    |                                                                                                                                                                            |                                                                                                                                                                                                                            |                        |         |
| Joint effusion                                                                      | -                                                                                                                                                                                                                                                                                                                                                                                                                               |                                   |       |                |      |                  |      |                            |    |                       |                    |                                                                                                                                                                                 |                 |                  |                    |                                                                                                                                                                            |                                                                                                                                                                                                                            |                        |         |
| Joint line tenderness                                                               | medial and lateral                                                                                                                                                                                                                                                                                                                                                                                                              |                                   |       |                |      |                  |      |                            |    |                       |                    |                                                                                                                                                                                 |                 |                  |                    |                                                                                                                                                                            |                                                                                                                                                                                                                            |                        |         |
| McMurray                                                                            | pain lateral                                                                                                                                                                                                                                                                                                                                                                                                                    |                                   |       |                |      |                  |      |                            |    |                       |                    |                                                                                                                                                                                 |                 |                  |                    |                                                                                                                                                                            |                                                                                                                                                                                                                            |                        |         |
| Thessaly                                                                            | pain lateral in 5°                                                                                                                                                                                                                                                                                                                                                                                                              |                                   |       |                |      |                  |      |                            |    |                       |                    |                                                                                                                                                                                 |                 |                  |                    |                                                                                                                                                                            |                                                                                                                                                                                                                            |                        |         |
|                                                                                     | <table border="1"> <thead> <tr> <th colspan="2">Physical therapy in last 3 months</th> </tr> </thead> <tbody> <tr> <td>No</td> <td></td> </tr> </tbody> </table>                                                                                                                                                                                                                                                                | Physical therapy in last 3 months |       | No             |      |                  |      |                            |    |                       |                    |                                                                                                                                                                                 |                 |                  |                    |                                                                                                                                                                            |                                                                                                                                                                                                                            |                        |         |
| Physical therapy in last 3 months                                                   |                                                                                                                                                                                                                                                                                                                                                                                                                                 |                                   |       |                |      |                  |      |                            |    |                       |                    |                                                                                                                                                                                 |                 |                  |                    |                                                                                                                                                                            |                                                                                                                                                                                                                            |                        |         |
| No                                                                                  |                                                                                                                                                                                                                                                                                                                                                                                                                                 |                                   |       |                |      |                  |      |                            |    |                       |                    |                                                                                                                                                                                 |                 |                  |                    |                                                                                                                                                                            |                                                                                                                                                                                                                            |                        |         |

**Profile 4**  
Administrative assistant  
  
50 y  
BMI 23

| Consultation                             |                    |
|------------------------------------------|--------------------|
| <i>Complaints</i>                        |                    |
| Pseudo-locking                           | -                  |
| VAS rest (0-100)                         | 1                  |
| VAS weight bearing (0-100)               | 7                  |
| IKDC score (0-100)                       | 63                 |
| <i>Physical exam</i>                     |                    |
| Flexion                                  | 140°               |
| Extension                                | 0°                 |
| Joint effusion                           | -                  |
| Joint line tenderness                    | pain lateral       |
| Mc Murray                                | -                  |
| Thessaly                                 | pain lateral in 5° |
| <i>Physical therapy in last 3 months</i> |                    |
| No                                       |                    |

**MRI**  
Medial meniscus: Intact  
Lateral meniscus: Complex tear

**X-ray**  
Kellgren-Lawrence (OA): Grade 2





**Profile 5**  
Fuel operator  
  
50 y  
BMI 23.8

| Consultation                             |                   |
|------------------------------------------|-------------------|
| <i>Complaints</i>                        |                   |
| Pseudo-locking                           | -                 |
| VAS rest (0-100)                         | 84                |
| VAS weight bearing (0-100)               | 100               |
| IKDC score (0-100)                       | 51                |
| <i>Physical exam</i>                     |                   |
| Flexion                                  | 135°              |
| Extension                                | 0°                |
| Joint effusion                           | -                 |
| Joint line tenderness                    | -                 |
| Mc Murray                                | -                 |
| Thessaly                                 | pain medial in 5° |
| <i>Physical therapy in last 3 months</i> |                   |
| Yes, 11 session                          |                   |

**MRI**  
Medial meniscus: Horizontal tear  
Lateral meniscus: Intact

**X-ray**  
Kellgren-Lawrence (OA): Grade 0





**Profile 6**  
Hotel manager  
  
60 y  
BMI 31

| Consultation                             |                   |
|------------------------------------------|-------------------|
| <i>Complaints</i>                        |                   |
| Pseudo-locking                           | +                 |
| VAS rest (0-100)                         | 45                |
| VAS weight bearing (0-100)               | 77                |
| IKDC score (0-100)                       | 40                |
| <i>Physical exam</i>                     |                   |
| Flexion                                  | 130°              |
| Extension                                | 0°                |
| Joint effusion                           | +                 |
| Joint line tenderness                    | medial            |
| Mc Murray                                | pain medial       |
| Thessaly                                 | pain medial in 5° |
| <i>Physical therapy in last 3 months</i> |                   |
| No                                       |                   |

**MRI**  
Medial meniscus: Horizontal tear  
Lateral meniscus: Intact

**X-ray**  
Kellgren-Lawrence (OA): Grade 1





Profile 7  
Taxi driver

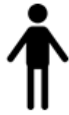

62 y  
BMI 26

**Consultation**

| <i>Complaints</i>                        |             |
|------------------------------------------|-------------|
| Pseudo-locking                           | +           |
| VAS rest (0-100)                         | 66          |
| VAS weight bearing (0-100)               | 51          |
| IKDC score (0-100)                       | 38          |
| <i>Physical exam</i>                     |             |
| Flexion                                  | 120°        |
| Extension                                | 0°          |
| Joint effusion                           | -           |
| Joint line tenderness                    | medial      |
| McMurray                                 | pain medial |
| Thessaly                                 | -           |
| <i>Physical therapy in last 3 months</i> |             |
| No                                       |             |

**MRI**

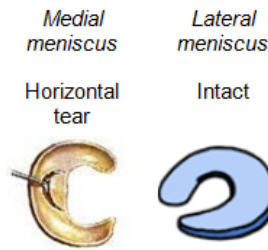

**X-ray**

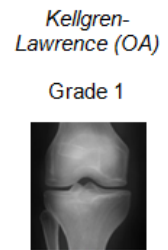

Profile 8  
Sculptor

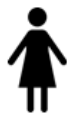

50 y  
BMI 23

**Consultation**

| <i>Complaints</i>                        |                    |
|------------------------------------------|--------------------|
| Pseudo-locking                           | -                  |
| VAS rest (0-100)                         | 69                 |
| VAS weight bearing (0-100)               | 91                 |
| IKDC score (0-100)                       | 37                 |
| <i>Physical exam</i>                     |                    |
| Flexion                                  | 130°               |
| Extension                                | 0°                 |
| Joint effusion                           | +                  |
| Joint line tenderness                    | medial             |
| McMurray                                 | pain medial        |
| Thessaly                                 | pain medial in 20° |
| <i>Physical therapy in last 3 months</i> |                    |
| No                                       |                    |

**MRI**

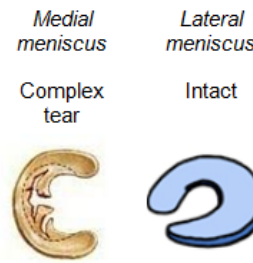

**X-ray**

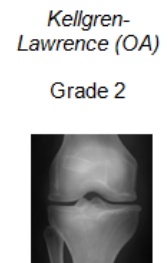

Profile 9  
Upholsterer

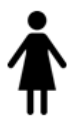

65 y  
BMI 25

**Consultation**

| <i>Complaints</i>                        |                    |
|------------------------------------------|--------------------|
| Pseudo-locking                           | -                  |
| VAS rest (0-100)                         | 4                  |
| VAS weight bearing (0-100)               | 93                 |
| IKDC score (0-100)                       | 26                 |
| <i>Physical exam</i>                     |                    |
| Flexion                                  | 110°               |
| Extension                                | 0°                 |
| Joint effusion                           | -                  |
| Joint line tenderness                    | -                  |
| McMurray                                 | -                  |
| Thessaly                                 | pain lateral in 5° |
| <i>Physical therapy in last 3 months</i> |                    |
| Yes, 2 sessions                          |                    |

**MRI**

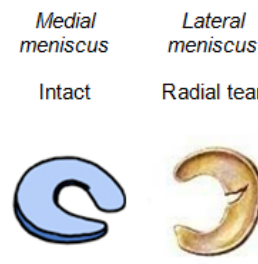

**X-ray**

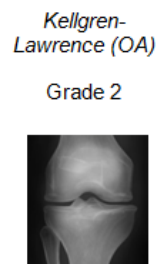

Profile 10  
Teacher  
primary school

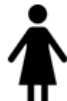

59 y

BMI 27

**Consultation**

| <i>Complaints</i>                        |                   |
|------------------------------------------|-------------------|
| Pseudo-locking                           | -                 |
| VAS rest (0-100)                         | 14                |
| VAS weight bearing (0-100)               | 68                |
| IKDC score (0-100)                       | 26                |
| <i>Physical exam</i>                     |                   |
| Flexion                                  | 130°              |
| Extension                                | 0°                |
| Joint effusion                           | +                 |
| Joint line tenderness                    | medial            |
| McMurray                                 | -                 |
| Thessaly                                 | pain medial in 5° |
| <i>Physical therapy in last 3 months</i> |                   |
| Yes, 20 sessions                         |                   |

**MRI**

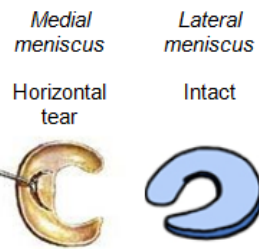

**X-ray**  
Kellgren-Lawrence (OA)

Grade 1

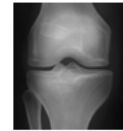

Profile 11  
Composer /  
musician

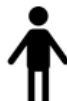

62 y

BMI 33

**Consultation**

| <i>Complaints</i>                        |                     |
|------------------------------------------|---------------------|
| Pseudo-locking                           | +                   |
| VAS rest (0-100)                         | 19                  |
| VAS weight bearing (0-100)               | 61                  |
| IKDC score (0-100)                       | 41                  |
| <i>Physical exam</i>                     |                     |
| Flexion                                  | 130°                |
| Extension                                | 0°                  |
| Joint effusion                           | -                   |
| Joint line tenderness                    | medial              |
| McMurray                                 | pain medial         |
| Thessaly                                 | pain medial in 5°   |
| Thessaly                                 | pain lateral in 20° |
| <i>Physical therapy in last 3 months</i> |                     |
| No                                       |                     |

**MRI**

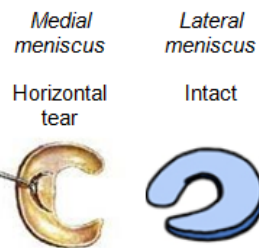

**X-ray**  
Kellgren-Lawrence (OA)

Grade 2

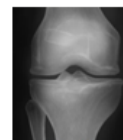

Profile 12  
Unemployed

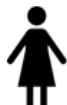

69 y

BMI 23

**Consultation**

| <i>Complaints</i>                        |                    |
|------------------------------------------|--------------------|
| Pseudo-locking                           | +                  |
| VAS rest (0-100)                         | 48                 |
| VAS weight bearing (0-100)               | 11                 |
| IKDC score (0-100)                       | 32                 |
| <i>Physical exam</i>                     |                    |
| Flexion                                  | 140°               |
| Extension                                | +5°                |
| Joint effusion                           | -                  |
| Joint line tenderness                    | lateral            |
| McMurray                                 | pain lateral       |
| Thessaly                                 | pain lateral in 5° |
| <i>Physical therapy in last 3 months</i> |                    |
| Yes, 4 sessions                          |                    |

**MRI**

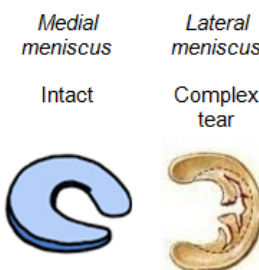

**X-ray**  
Kellgren-Lawrence (OA)

Grade 2

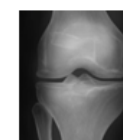

Profile 13  
Unemployed

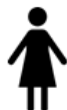

62 y

BMI 32

### Consultation

|                                          |             |
|------------------------------------------|-------------|
| <i>Complaints</i>                        |             |
| Pseudo-locking                           | -           |
| VAS rest (0-100)                         | 67          |
| VAS weight bearing (0-100)               | 90          |
| IKDC score (0-100)                       | 13          |
| <i>Physical exam</i>                     |             |
| Flexion                                  | 130°        |
| Extension                                | +5°         |
| Joint effusion                           | +           |
| Joint line tenderness                    | medial      |
| McMurray                                 | pain medial |
| Thessaly                                 | -           |
| <i>Physical therapy in last 3 months</i> |             |
| Yes, 2 sessions                          |             |

### MRI

*Medial meniscus*  
Horizontal tear

*Lateral meniscus*  
Intact

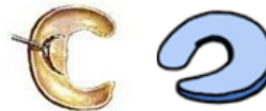

### X-ray

*Kellgren-Lawrence (OA)*  
Grade 2

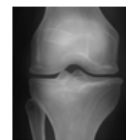

Profile 14  
Pharmacy assistant

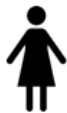

46 y

BMI 24

### Consultation

|                                          |                    |
|------------------------------------------|--------------------|
| <i>Complaints</i>                        |                    |
| Pseudo-locking                           | +                  |
| VAS rest (0-100)                         | 61                 |
| VAS weight bearing (0-100)               | 57                 |
| IKDC score (0-100)                       | 63                 |
| <i>Physical exam</i>                     |                    |
| Flexion                                  | 140°               |
| Extension                                | 0°                 |
| Joint effusion                           | -                  |
| Joint line tenderness                    | -                  |
| McMurray                                 | pain lateral       |
| Thessaly                                 | pain lateral in 5° |
| <i>Physical therapy in last 3 months</i> |                    |
| No                                       |                    |

### MRI

*Medial meniscus*  
Intact

*Lateral meniscus*  
Horizontal

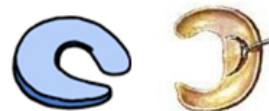

### X-ray

*Kellgren-Lawrence (OA)*  
Grade 1

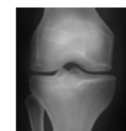

Profile 15  
Civil servant

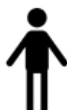

49 y

BMI 22

### Consultation

|                                          |                   |
|------------------------------------------|-------------------|
| <i>Complaints</i>                        |                   |
| Pseudo-locking                           | -                 |
| VAS rest (0-100)                         | 25                |
| VAS weight bearing (0-100)               | 81                |
| IKDC score (0-100)                       | 36                |
| <i>Physical exam</i>                     |                   |
| Flexion                                  | 145°              |
| Extension                                | 0°                |
| Joint effusion                           | +                 |
| Joint line tenderness                    | medial            |
| McMurray                                 | pain medial       |
| Thessaly                                 | pain medial in 5° |
| <i>Physical therapy in last 3 months</i> |                   |
| Yes, 3 sessions                          |                   |

### MRI

*Medial meniscus*  
Horizontal tear

*Lateral meniscus*  
Horizontal tear

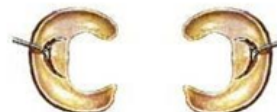

### X-ray

*Kellgren-Lawrence (OA)*  
Grade 1

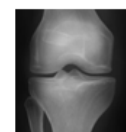

Profile 16  
Saleswoman

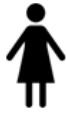

51 y

BMI 35

**Consultation**

| <i>Complaints</i>                        |                   |
|------------------------------------------|-------------------|
| Pseudo-locking                           | +                 |
| VAS rest (0-100)                         | 12                |
| VAS weight bearing (0-100)               | 64                |
| IKDC score (0-100)                       | 49                |
| <i>Physical exam</i>                     |                   |
| Flexion                                  | 135°              |
| Extension                                | 0°                |
| Joint effusion                           | +                 |
| Joint line tenderness                    | medial            |
| McMurray                                 | pain medial       |
| Thessaly                                 | pain medial in 5° |
| <i>Physical therapy in last 3 months</i> |                   |
| Yes, 9 sessions                          |                   |

**MRI**

*Medial meniscus*  
Complex tear

*Lateral meniscus*  
Intact

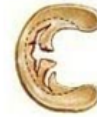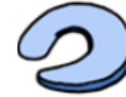

**X-ray**

*Kellgren-Lawrence (OA)*

Grade 2

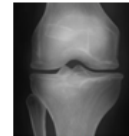

Profile 17  
Unemployed

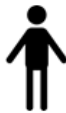

66 y

BMI 26

**Consultation**

| <i>Complaints</i>                        |                   |
|------------------------------------------|-------------------|
| Pseudo-locking                           | +                 |
| VAS rest (0-100)                         | 67                |
| VAS weight bearing (0-100)               | 90                |
| IKDC score (0-100)                       | 33                |
| <i>Physical exam</i>                     |                   |
| Flexion                                  | 130°              |
| Extension                                | -5°               |
| Joint effusion                           | +                 |
| Joint line tenderness                    | medial            |
| McMurray                                 | pain medial       |
| Thessaly                                 | pain medial in 5° |
| <i>Physical therapy in last 3 months</i> |                   |
| No                                       |                   |

**MRI**

*Medial meniscus*  
Horizontal tear

*Lateral meniscus*  
Intact

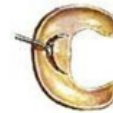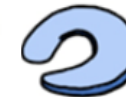

**X-ray**

*Kellgren-Lawrence (OA)*

Grade 1

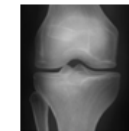

Profile 18  
Varnish processor

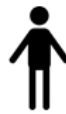

51 y

BMI 28

**Consultation**

| <i>Complaints</i>                        |                    |
|------------------------------------------|--------------------|
| Pseudo-locking                           | +                  |
| VAS rest (0-100)                         | 6                  |
| VAS weight bearing (0-100)               | 8                  |
| IKDC score (0-100)                       | 29                 |
| <i>Physical exam</i>                     |                    |
| Flexion                                  | 140°               |
| Extension                                | 5°                 |
| Joint effusion                           | -                  |
| Joint line tenderness                    | medial and lateral |
| McMurray                                 | click lateral      |
| Thessaly                                 | pain medial in 5°  |
| <i>Physical therapy in last 3 months</i> |                    |
| No                                       |                    |

**MRI**

*Medial meniscus*  
Horizontal tear

*Lateral meniscus*  
Intact

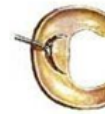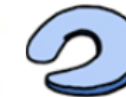

**X-ray**

*Kellgren-Lawrence (OA)*

Grade 1

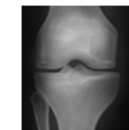

**Profile 19**

Agent /  
salesman

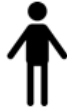

63 y

BMI 25

**Consultation**

| <i>Complaints</i>                        |              |
|------------------------------------------|--------------|
| Pseudo-locking                           | -            |
| VAS rest (0-100)                         | 10           |
| VAS weight bearing (0-100)               | 11           |
| IKDC score (0-100)                       | 68           |
| <i>Physical exam</i>                     |              |
| Flexion                                  | 135°         |
| Extension                                | 0°           |
| Joint effusion                           | +            |
| Joint line tenderness                    | lateral      |
| McMurray                                 | pain lateral |
| Thessaly                                 | -            |
| <i>Physical therapy in last 3 months</i> |              |
| No                                       |              |

**MRI**

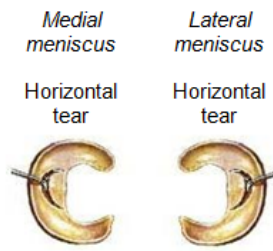

**X-ray**

Kellgren-Lawrence (OA)

Grade 3

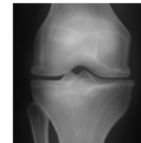

**Profile 20**  
Unemployed

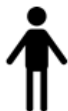

51 y

BMI 28

**Consultation**

| <i>Complaints</i>                        |                    |
|------------------------------------------|--------------------|
| Pseudo-locking                           | -                  |
| VAS rest (0-100)                         | 42                 |
| VAS weight bearing (0-100)               | 42                 |
| IKDC score (0-100)                       | 60                 |
| <i>Physical exam</i>                     |                    |
| Flexion                                  | 120°               |
| Extension                                | 0                  |
| Joint effusion                           | -                  |
| Joint line tenderness                    | medial             |
| McMurray                                 | -                  |
| Thessaly                                 | pain medial in 20° |
| <i>Physical therapy in last 3 months</i> |                    |
| No                                       |                    |

**MRI**

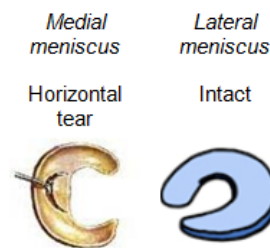

**X-ray**

Kellgren-Lawrence (OA)

Grade 1

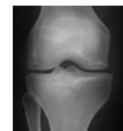



## Supplement 2: Survey content

### Biographics

Years of experience as orthopaedic surgeon:

- Less than 5 years
- Between 5 and 15 years
- More than 15 years

Field of expertise (more options possible):

- Knee surgery
- Hip surgery
- Shoulder/elbow surgery
- Back surgery
- Foot/ankle surgery
- Trauma surgery
- Arthroscopic surgery
- Sports injuries
- Infectiology
- Other: .....

In clinical decision making, what relative weighting do you give to evidence from your personal experience and of those around you, compared to evidence from clinical research?

*Experience based*

*Published clinical research*

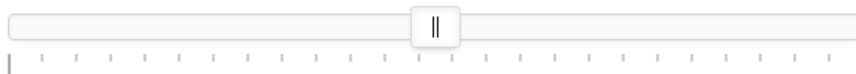

### The evidence

The following statements concern treatment (meniscectomy versus physical therapy) in patients between 45 and 70 years old with a non-obstructive meniscal tear

I am completely up to date with the literature on this topic

- Strongly disagree
- Disagree
- Neither agree nor disagree
- Agree
- Strongly agree

I think the evidence on this topic is very strong

- Strongly disagree
- Disagree
- Neither agree nor disagree
- Agree
- Strongly agree

I feel very confident in choosing between both treatment options

- Strongly disagree
- Disagree
- Neither agree nor disagree
- Agree
- Strongly agree

In my opinion, meniscectomy is a good option for the initial treatment of patients between 45 and 70 years old with a non-obstructive meniscal tear

- Strongly disagree
- Disagree
- Neither agree nor disagree
- Agree
- Strongly agree

In my opinion, physical therapy is a good option for the initial treatment of patients between 45 and 70 years old with a non-obstructive meniscal tear

- Strongly disagree
- Disagree
- Neither agree nor disagree
- Agree
- Strongly agree

#### Patient profiles 1-20 (example profile 1)

In the next section you will be presented 20 patient profiles. On the basis of every profile we kindly ask you to answer 3 questions.

#### Explanation of terms and abbreviations used:

##### Complaints

- *Pseudo-locking*

- A “catching” sensation which inhibits moving but quickly disappears. No true (irretrievable) knee locking.
- *VAS pain (0-100)*
  - Visual analogue scale to express pain. A score of 0 corresponds to no pain at all and a score of 100 reflects the worst possible pain. This score is divided into a score at rest and one during weight bearing.
- *IKDC (0-100)*
  - International Knee Documentation Committee (IKDC) ‘Subjective Knee Form’. The maximum of 100 points reflects no restrictions in daily and sports activities and the absence of symptoms. A change of more than 8.8 points in IKDC score is considered to exceed the smallest detectable change. The mentioned score in the patient profile corresponds to the baseline score (before treatment).

#### Physical exam

- Flexion of the knee; in degrees.
- Extension of the knee; in degrees. +5° means hyperextension, and -5° means a limitation of extension.
- Joint effusion; the presence of joint effusion. + means yes, - means no.
- Joint line tenderness; the presence of medial or lateral joint line tenderness during compression.
- McMurray; expressed as the presence of pain, a click, or both.
- Thessaly test; expressed for 5° or 20° knee flexion. If the Thessaly test is positive (e.g. pain) in 5°, it is assumed that it is positive in 20°. If 20° is presented, the test in 5° was negative.

#### MRI

All MRIs were viewed by one radiologist and tears were classified according to the ISAKOS classification.

#### X-ray (OA)

Osteoarthritis on Kellgren Lawrence scale. In this study patients with grade 4 were excluded. The miniature picture is a standardized image from the classification and does not represent the authentic X-ray of the described patient.

**Profile 1**  
Unemployed



50 y  
BMI 23

| Consultation                             |             |
|------------------------------------------|-------------|
| <i>Complaints</i>                        |             |
| Pseudo-locking                           | -           |
| VAS rest (0-100)                         | 1           |
| VAS weight bearing (0-100)               | 7           |
| IKDC score (0-100)                       | 85          |
| <i>Physical exam</i>                     |             |
| Flexion                                  | 140°        |
| Extension                                | +5°         |
| Joint effusion                           | -           |
| Joint line tenderness                    | -           |
| McMurray                                 | pain medial |
| Thessaly                                 | -           |
| <i>Physical therapy in last 3 months</i> |             |
| No                                       |             |

**MRI**

|                        |                         |
|------------------------|-------------------------|
| <i>Medial meniscus</i> | <i>Lateral meniscus</i> |
| Horizontal tear        | Intact                  |




**X-ray**  
*Kellgren-Lawrence (OA)*  
Grade 1



Would you prefer meniscectomy or physical therapy as treatment in this particular patient?

- Arthroscopic partial meniscectomy (APM)
- Physical therapy (PT)

What would you think that will be the effect of your treatment of choice on knee function after two years?

- Strong deterioration (at least 20 points on IKDC)
- Mild deterioration (10-20 points on IKDC)
- No relevant difference (-10 to +10 points on IKDC)
- Some improvement (10-20 points on IKDC)
- Strong improvement (at least 20 points on IKDC)

What will the outcome be if the other treatment would be applied?

- Strong deterioration (at least 20 points on IKDC)
- Mild deterioration (10-20 points on IKDC)
- No relevant difference (-10 to +10 points on IKDC)
- Some improvement (10-20 points on IKDC)
- Strong improvement (at least 20 points on IKDC)

#### Patient characteristics

On this page we would like to ask you which of the following patient characteristics affect your treatment choice and if so, in which direction?

- Younger patients (approximately <45 years)
  - APM
  - PT
  - Unaffected

The same lay-out was used for all following characteristics:

- Older patients (approximately >45 years)
- Normal BMI (18,5 - 25 kg/m<sup>2</sup>)
- Obesity (BMI>25 kg/m<sup>2</sup>)
- Absence of obstructive/locking complaints
- Presence of obstructive/locking complaints
- Medial tear
- Lateral tear
- Longitudinal-vertical (ISAKOS)
- Horizontal tear (ISAKOS)
- Radial tear (ISAKOS)
- Vertical flap tear (ISAKOS)
- Complex tear (ISAKOS)
- Bucket handle tear
- No-mild osteoarthritis (Kellgren Lawrence 0 - 2)
- Moderate-severe osteoarthritis (Kellgren Lawrence 3 - 4)
- Lower education level
- Higher education level
- Poor baseline physical function (IKDC approximately < 30)
- Good baseline physical function (IKDC approximately > 50)
- Low activity level (Tegner 1-3)
- High activity levels (Tegner >3)
- Lower levels of pain (VAS < 7)
- Higher levels of pain (VAS > 7)
- Male gender
- Female gender
- A patient's wish for practicing sports
- Traumatic etiology
- Degenerative etiology
- Failed conservative treatment

**Supplement 3: Characteristics of surgeons**

| <i>Years of experience as orthopaedic surgeon</i>               | <i>Number</i> | <i>Percentage</i> |
|-----------------------------------------------------------------|---------------|-------------------|
| Less than 5 years                                               | 35            | 18.0              |
| Between 5 and 15 years                                          | 57            | 29.4              |
| More than 15 years                                              | 71            | 36.6              |
| Resident orthopaedic surgery                                    | 30            | 15.5              |
| Estimated number of performed knee arthroscopies during career: |               |                   |
| Less than 10                                                    | 5             | 2.6               |
| Less than 50                                                    | 21            | 10.8              |
| Between 50 and 150                                              | 33            | 17.0              |
| More than 150                                                   | 134           | 69.1              |
| Fields of expertise (more options possible):                    |               |                   |
| Knee surgery                                                    | 146           | 75.3              |
| Hip surgery                                                     | 107           | 55.2              |
| Shoulder/elbow surgery                                          | 49            | 25.3              |
| Back surgery                                                    | 18            | 9.3               |
| Foot/ankle surgery                                              | 35            | 18.0              |
| Trauma surgery                                                  | 79            | 40.7              |
| Arthroscopic surgery                                            | 75            | 38.7              |
| Sports injuries                                                 | 69            | 35.6              |
| Infectiology                                                    | 11            | 5.7               |
| Paediatric surgery                                              | 5             | 2.6               |
| Hand/wrist surgery                                              | 5             | 2.6               |

**Supplement 4: Opinion towards the literature**

| In clinical decision making, what relative weighting do you give to evidence from your personal experience and of those around you compared to evidence from clinical research? |                             | Chosen by all surgeons (%) | Chosen by experienced knee surgeons (%) | Chosen by other orthopaedic surgeons (%) |
|---------------------------------------------------------------------------------------------------------------------------------------------------------------------------------|-----------------------------|----------------------------|-----------------------------------------|------------------------------------------|
| <br> <br> <br>                                                                                                                                                                  | Experience based            | 0.5                        | 0                                       | 1.1                                      |
|                                                                                                                                                                                 |                             | 12.4                       | 12.9                                    | 11.8                                     |
|                                                                                                                                                                                 |                             | 38.1                       | 42.6                                    | 33.3                                     |
|                                                                                                                                                                                 |                             | 44.3                       | 37.6                                    | 51.6                                     |
|                                                                                                                                                                                 | Published clinical research | 4.6                        | 6.9                                     | 2.2                                      |

  

| I'm completely up to date with literature on this topic |      |      |      |  |
|---------------------------------------------------------|------|------|------|--|
| Strongly disagree                                       | 0.5  | 0    | 1.1  |  |
| Disagree                                                | 5.2  | 0    | 10.8 |  |
| Neither agree nor disagree                              | 17   | 13.9 | 20.4 |  |
| Agree                                                   | 64.4 | 71.3 | 57   |  |
| Strongly agree                                          | 12.9 | 14.9 | 10.8 |  |

  

| The evidence on this topic is convincing |      |      |      |  |
|------------------------------------------|------|------|------|--|
| Strongly disagree                        | 0.5  | 0    | 1.1  |  |
| Disagree                                 | 8.2  | 11.9 | 4.3  |  |
| Neither agree nor disagree               | 17   | 14.9 | 19.4 |  |
| Agree                                    | 63.9 | 63.4 | 64.5 |  |
| Strongly agree                           | 10.3 | 9.9  | 10.8 |  |

  

| I feel very confident in choosing between both treatment options |      |      |      |  |
|------------------------------------------------------------------|------|------|------|--|
| Strongly disagree                                                | 1    | 0    | 2.2  |  |
| Disagree                                                         | 6.7  | 5    | 8.6  |  |
| Neither agree nor disagree                                       | 16.5 | 10.9 | 22.6 |  |
| Agree                                                            | 65.5 | 71.3 | 59.1 |  |
| Strongly agree                                                   | 10.3 | 12.9 | 7.5  |  |

In my opinion, meniscectomy is a good option for the initial treatment of patients between 45 and 70 years old with a non-obstructive meniscal tear

|                            |      |      |      |
|----------------------------|------|------|------|
| Strongly disagree          | 39.2 | 38.6 | 39.8 |
| Disagree                   | 49.5 | 47.5 | 51.6 |
| Neither agree nor disagree | 8.2  | 9.9  | 6.5  |
| Agree                      | 3.1  | 4    | 2.2  |
| Strongly agree             | 0    | 0    | 0    |

In my opinion, physical therapy is a good option for the initial treatment of patients between 45 and 70 years old with a non-obstructive meniscal tear

|                            |      |      |      |
|----------------------------|------|------|------|
| Strongly disagree          | 1.5  | 2    | 1.1  |
| Disagree                   | 7.2  | 10.9 | 3.2  |
| Neither agree nor disagree | 13.9 | 16.8 | 10.8 |
| Agree                      | 48.5 | 48.5 | 48.4 |
| Strongly agree             | 28.9 | 21.8 | 36.6 |

Experienced knee surgeons are orthopaedic surgeons with at least 5 years of experience in knee surgery.



**Supplement 5: Results of the treatment choice affecting patient characteristics**

| Patient characteristics                                   | Proportion of surgeons directed towards APM (%) | Proportion of surgeons directed towards PT (%) | Proportion of surgeons for whom characteristic did not influence treatment choice (%) |
|-----------------------------------------------------------|-------------------------------------------------|------------------------------------------------|---------------------------------------------------------------------------------------|
| Higher education level                                    | 6                                               | 6                                              | 88                                                                                    |
| Lower education level                                     | 2                                               | 11                                             | 88                                                                                    |
| Male gender                                               | 10                                              | 5                                              | 85                                                                                    |
| Female gender                                             | 2                                               | 14                                             | 84                                                                                    |
| Medial tear                                               | 21                                              | 7                                              | 72                                                                                    |
| Lateral tear                                              | 11                                              | 26                                             | 63                                                                                    |
| A patient's wish for practicing sports                    | 33                                              | 8                                              | 59                                                                                    |
| Normal BMI (18,5 - 25 kg/m <sup>2</sup> )                 | 39                                              | 5                                              | 56                                                                                    |
| Higher levels of pain (VAS > 7)                           | 29                                              | 15                                             | 56                                                                                    |
| Radial tear (ISAKOS)                                      | 26                                              | 20                                             | 54                                                                                    |
| Longitudinal-vertical (ISAKOS)                            | 36                                              | 10                                             | 54                                                                                    |
| Good baseline physical function (IKDC approximately > 50) | 30                                              | 19                                             | 52                                                                                    |
| Horizontal tear (ISAKOS)                                  | 7                                               | 42                                             | 51                                                                                    |
| Horizontal flap tear (ISAKOS)                             | 38                                              | 16                                             | 46                                                                                    |
| High activity levels (Tegner >3)                          | 49                                              | 6                                              | 45                                                                                    |
| Lower levels of pain (VAS < 7)                            | 5                                               | 50                                             | 45                                                                                    |
| Vertical flap tear (ISAKOS)                               | 51                                              | 7                                              | 43                                                                                    |
| Complex tear (ISAKOS)                                     | 26                                              | 31                                             | 43                                                                                    |
| Low activity level (Tegner 1-3)                           | 1                                               | 63                                             | 36                                                                                    |
| Poor baseline physical function (IKDC approximately < 30) | 10                                              | 56                                             | 34                                                                                    |
| No-mild osteoarthritis (KL 0 - 2)                         | 61                                              | 8                                              | 31                                                                                    |
| Younger patients (approximately <45 years)                | 74                                              | 1                                              | 25                                                                                    |
| Traumatic aetiology                                       | 76                                              | 3                                              | 22                                                                                    |
| Obesity (BMI>25 kg/m <sup>2</sup> )                       | 2                                               | 79                                             | 20                                                                                    |
| Presence of obstructive/locking complaints                | 82                                              | 3                                              | 15                                                                                    |
| Failed conservative treatment                             | 82                                              | 3                                              | 15                                                                                    |

|                                           |    |    |    |
|-------------------------------------------|----|----|----|
| Older patients (approximately >45 years)  | 1  | 87 | 13 |
| Absence of obstructive/locking complaints | 1  | 88 | 11 |
| Degenerative aetiology                    | 1  | 92 | 7  |
| Bucket handle tear                        | 94 | 0  | 6  |
| Moderate-severe osteoarthritis (KL 3 - 4) | 1  | 96 | 3  |

The percentages were generated based on information from the section '*Patient characteristics*' from the survey (Supplement 2).

BMI = Body Mass Index; IKDC = International Knee Documentation Committee; ISAKOS = International Society of Arthroscopy, Knee Surgery and Orthopaedic Sports Medicine; KL = Kellgren Lawrence; VAS = Visual Analog Scale
